# Supplementary material for: En busca del equilibrio: evaluación del impacto ambiental en obras hidráulicas
Source: Springer Nature journal article supplement (doi:10.1038/s41467-023-35938-x), 2002-01-01
Supplement: 41467_2023_35938_MOESM11_ESM.pdf [file 41467_2023_35938_MOESM11_ESM.pdf]

## Reporting Summary

Nature Portfolio wishes to improve the reproducibility of the work that we publish. This form provides structure for consistency and transparency in reporting. For further information on Nature Portfolio policies, see our [Editorial Policies](#) and the [Editorial Policy Checklist](#).

### Statistics

For all statistical analyses, confirm that the following items are present in the figure legend, table legend, main text, or Methods section.

n/a Confirmed

- |                                     |                                     |                                                                                                                                                                                                                                                            |
|-------------------------------------|-------------------------------------|------------------------------------------------------------------------------------------------------------------------------------------------------------------------------------------------------------------------------------------------------------|
| <input type="checkbox"/>            | <input checked="" type="checkbox"/> | The exact sample size ( $n$ ) for each experimental group/condition, given as a discrete number and unit of measurement                                                                                                                                    |
| <input type="checkbox"/>            | <input checked="" type="checkbox"/> | A statement on whether measurements were taken from distinct samples or whether the same sample was measured repeatedly                                                                                                                                    |
| <input type="checkbox"/>            | <input checked="" type="checkbox"/> | The statistical test(s) used AND whether they are one- or two-sided<br><i>Only common tests should be described solely by name; describe more complex techniques in the Methods section.</i>                                                               |
| <input type="checkbox"/>            | <input checked="" type="checkbox"/> | A description of all covariates tested                                                                                                                                                                                                                     |
| <input type="checkbox"/>            | <input checked="" type="checkbox"/> | A description of any assumptions or corrections, such as tests of normality and adjustment for multiple comparisons                                                                                                                                        |
| <input type="checkbox"/>            | <input checked="" type="checkbox"/> | A full description of the statistical parameters including central tendency (e.g. means) or other basic estimates (e.g. regression coefficient) AND variation (e.g. standard deviation) or associated estimates of uncertainty (e.g. confidence intervals) |
| <input type="checkbox"/>            | <input checked="" type="checkbox"/> | For null hypothesis testing, the test statistic (e.g. $F$ , $t$ , $r$ ) with confidence intervals, effect sizes, degrees of freedom and $P$ value noted<br><i>Give <math>P</math> values as exact values whenever suitable.</i>                            |
| <input type="checkbox"/>            | <input checked="" type="checkbox"/> | For Bayesian analysis, information on the choice of priors and Markov chain Monte Carlo settings                                                                                                                                                           |
| <input checked="" type="checkbox"/> | <input type="checkbox"/>            | For hierarchical and complex designs, identification of the appropriate level for tests and full reporting of outcomes                                                                                                                                     |
| <input type="checkbox"/>            | <input checked="" type="checkbox"/> | Estimates of effect sizes (e.g. Cohen's $d$ , Pearson's $r$ ), indicating how they were calculated                                                                                                                                                         |

*Our web collection on [statistics for biologists](#) contains articles on many of the points above.*

### Software and code

Policy information about [availability of computer code](#)

Data collection

Data analysis

For manuscripts utilizing custom algorithms or software that are central to the research but not yet described in published literature, software must be made available to editors and reviewers. We strongly encourage code deposition in a community repository (e.g. GitHub). See the Nature Portfolio [guidelines for submitting code & software](#) for further information.

### Data

Policy information about [availability of data](#)

All manuscripts must include a [data availability statement](#). This statement should provide the following information, where applicable:

- Accession codes, unique identifiers, or web links for publicly available datasets
- A description of any restrictions on data availability
- For clinical datasets or third party data, please ensure that the statement adheres to our [policy](#)

GSE168415  
<https://www.ncbi.nlm.nih.gov/geo/query/acc.cgi?acc=GSE168415>

## Human research participants

Policy information about [studies involving human research participants and Sex and Gender in Research](#).

|                             |                |
|-----------------------------|----------------|
| Reporting on sex and gender | does not apply |
| Population characteristics  | does not apply |
| Recruitment                 | does not apply |
| Ethics oversight            | does not apply |

Note that full information on the approval of the study protocol must also be provided in the manuscript.

## Field-specific reporting

Please select the one below that is the best fit for your research. If you are not sure, read the appropriate sections before making your selection.

Life sciences     Behavioural & social sciences     Ecological, evolutionary & environmental sciences

For a reference copy of the document with all sections, see [nature.com/documents/nr-reporting-summary-flat.pdf](https://www.nature.com/documents/nr-reporting-summary-flat.pdf)

## Life sciences study design

All studies must disclose on these points even when the disclosure is negative.

|                 |                                                            |
|-----------------|------------------------------------------------------------|
| Sample size     | does not apply                                             |
| Data exclusions | does not apply                                             |
| Replication     | Per performed at least 3 replications for each experiment. |
| Randomization   | does not apply                                             |
| Blinding        | does not apply                                             |

## Reporting for specific materials, systems and methods

We require information from authors about some types of materials, experimental systems and methods used in many studies. Here, indicate whether each material, system or method listed is relevant to your study. If you are not sure if a list item applies to your research, read the appropriate section before selecting a response.

### Materials & experimental systems

| n/a                                 | Involvement in the study                                  |
|-------------------------------------|-----------------------------------------------------------|
| <input type="checkbox"/>            | <input checked="" type="checkbox"/> Antibodies            |
| <input type="checkbox"/>            | <input checked="" type="checkbox"/> Eukaryotic cell lines |
| <input checked="" type="checkbox"/> | <input type="checkbox"/> Palaeontology and archaeology    |
| <input checked="" type="checkbox"/> | <input type="checkbox"/> Animals and other organisms      |
| <input checked="" type="checkbox"/> | <input type="checkbox"/> Clinical data                    |
| <input checked="" type="checkbox"/> | <input type="checkbox"/> Dual use research of concern     |

### Methods

| n/a                                 | Involvement in the study                        |
|-------------------------------------|-------------------------------------------------|
| <input type="checkbox"/>            | <input checked="" type="checkbox"/> ChIP-seq    |
| <input checked="" type="checkbox"/> | <input type="checkbox"/> Flow cytometry         |
| <input checked="" type="checkbox"/> | <input type="checkbox"/> MRI-based neuroimaging |

## Antibodies

|                 |                                                                                                                                                                                    |
|-----------------|------------------------------------------------------------------------------------------------------------------------------------------------------------------------------------|
| Antibodies used | Abcam ab122932 R&D Systems AF3369; R&D Systems A5441; Abcam ab22569; Santa Cruz sc-365823; Sigma SAB4200080; Diagenode C15200203-100; Millipore 07-473, Abcam b8895a; Abcam ab4729 |
| Validation      | WE followed manufactoral protocols.                                                                                                                                                |

## Eukaryotic cell lines

Policy information about [cell lines and Sex and Gender in Research](#)

|                                                                      |                                                            |
|----------------------------------------------------------------------|------------------------------------------------------------|
| Cell line source(s)                                                  | mouse E14 Thermo Fisher.                                   |
| Authentication                                                       | Cells were authenticated by sequencing.                    |
| Mycoplasma contamination                                             | Cells were tested for mycoplasma and were mycoplasma free. |
| Commonly misidentified lines<br>(See <a href="#">ICLAC</a> register) | does not apply                                             |

## ChIP-seq

### Data deposition

- Confirm that both raw and final processed data have been deposited in a public database such as [GEO](#).
- Confirm that you have deposited or provided access to graph files (e.g. BED files) for the called peaks.

|                                                                    |                                                                                                                                                                                                                             |
|--------------------------------------------------------------------|-----------------------------------------------------------------------------------------------------------------------------------------------------------------------------------------------------------------------------|
| Data access links<br><i>May remain private before publication.</i> | To review GEO accession GSE168415 go to <a href="https://www.ncbi.nlm.nih.gov/geo/query/acc.cgi?acc=GSE168415">https://www.ncbi.nlm.nih.gov/geo/query/acc.cgi?acc=GSE168415</a><br>Enter token qhmrsyggntwrnk into the box. |
| Files in database submission                                       | H3K27ac ; H3K4me1; H3K4me3 and Input DNA in EpiLCs and ME.                                                                                                                                                                  |
| Genome browser session<br>(e.g. <a href="#">UCSC</a> )             | <i>Provide a link to an anonymized genome browser session for "Initial submission" and "Revised version" documents only, to enable peer review. Write "no longer applicable" for "Final submission" documents.</i>          |

### Methodology

|                         |                                                                                                                                                                                                                                                                                               |
|-------------------------|-----------------------------------------------------------------------------------------------------------------------------------------------------------------------------------------------------------------------------------------------------------------------------------------------|
| Replicates              | At least one replicate for each condition.                                                                                                                                                                                                                                                    |
| Sequencing depth        | Single read, 76 bp. Number of sequenced reads: 20685440 (H3K27ac in EpiLCs); 29531696 (h3K4m1 EpiLCs); 22014065 (H3K4me3 EpiLCs); 20673711 (input EpiLCs); 29117898 (H327ac ME); 22713350 (H3K4me1 ME); 26492699 (H3K4me3 ME); 22491775 (input ME).                                           |
| Antibodies              | H3K4me3 07-473 Millipore<br>H3K4me1 ab8895 Abcam<br>H3K27ac ab4729 Abcam                                                                                                                                                                                                                      |
| Peak calling parameters | Peaks were called using MACS v2.1.1, with minimum FDR set to 0.05                                                                                                                                                                                                                             |
| Data quality            | All peaks have FDR <= 5%. >50% peaks have fold-enrichment >=5.                                                                                                                                                                                                                                |
| Software                | Mapping was performed using Bowtie v2.3.4.1 (options: -q --local). Duplicated alignments (identified by Picard MarkDuplicates - v2.21) and multi-mapping reads were excluded using SAMtools v 1.9. Peak calling was performed using MACS v2.1.1, with FDR cut-off at 0.05 (options: -q 0.05). |
